# Supplementary material
Source: PubMed Central journal article supplement (PMC7755074)
Supplement: NIHMS1645660-supplement-Xu_et_al_Supplemtary_Tables_1_2.pdf [file NIHMS1645660-supplement-Xu_et_al_Supplemtary_Tables_1_2.pdf]

**Supplementary Table 1.** Experimental contributions to each significant cluster in main effect of all studies inducing pain (n = 200)

| Cluster                               | Experiments                                                                                                                                                                                                                                                                                                                                                                                                                                                                                                                                                                           |
|---------------------------------------|---------------------------------------------------------------------------------------------------------------------------------------------------------------------------------------------------------------------------------------------------------------------------------------------------------------------------------------------------------------------------------------------------------------------------------------------------------------------------------------------------------------------------------------------------------------------------------------|
| Cluster 1: 14522 voxels (58, -24, 22) | Ando 2016<br>Ariji 2018<br>Asghar 2015<br>Asghar 2016<br>Atlas 2010<br>Atlas 2014<br>Baliki 2006<br>Baliki 2009a<br>Baliki 2010<br>Bar 2007<br>Becker 2017<br>Benson 2012<br>Bingel 2007a<br>Bogdanov 2015<br>Boland 2014<br>Bouhassira 2013<br>Boyle 2007<br>Brinkmeyer 2010<br>Brooks 2017<br>Brugger 2011<br>Brugger 2012<br>Choi 2011<br>Choi 2016<br>Cleve 2017<br>Coen 2008<br>Coen 2009<br>Coen 2011<br>Cole 2006<br>Cole 2010<br>Corradi-Dell' Acqua 2011<br>Davis 2016<br>De la Fuente-Sandoval 2010<br>De la Fuente-Sandoval 2012<br>Dobek 2014<br>Downar 2003<br>Dube 2009 |

Dunckley 2005a  
Eisenblatter 2017  
Elsenbruch 2009  
Esser 2017  
Ettlin 2009  
Farmer 2013  
Farrell 2012  
Farrell 2014  
Fehse 2015  
Forkmann 2013  
Frankenstein 2001  
Freund 2007  
Freund 2009  
Gard 2012  
Geuze 2007  
Godinho 2012  
Gracely 2002  
Grant 2011  
Gu 2016  
Guleria 2017  
Gundel 2008  
Habig 2017  
Hahn 2013  
Hansen 2015  
Heckel\_2011  
Hu 2015  
Iannilli 2008  
Ibinson 2013  
Jahn 2016  
Jensen 2015  
Kamping 2016  
Kattoor 2013  
Kim 2013b  
Kobuch 2017  
Kobuch 2018  
Kong 2006  
Kong 2010  
Koyama 2005  
Kross 2011  
LaCesa 2014

Ladabaum 2007  
Landgrebe 2008  
Lee 2008  
Lee 2015  
Leung 2016a  
Lindstedt 2011  
Lloyd 2008  
Loggia 2012  
Loggia 2014  
Loken 2017  
Longo 2012  
Lopez-Sola 2010a  
Lopez-Sola 2010b  
Lu 2004  
Lui 2008  
Lutz 2013  
Lynn 2016  
Maeda 2011  
Maihofner 2004  
Maihofner 2005  
Maihofner 2006  
Maihofner 2011  
Mainero 2007  
Markl 2013  
Martin 2013  
Mayhew 2013  
Meier 2015  
Misra 2015  
Moana-Filho 2015  
Mobascher 2009a  
Mobascher 2009b  
Mobascher 2010a  
Mobascher 2010b  
Mochizuki 2007  
Mohr 2008  
Moisset 2010  
Morrison 2004  
Moulton 2011  
Moulton 2012  
Naglatzki 2012

Nickel 2014  
Niddam 2002  
Obermann 2009  
Ochsner 2006  
Oertel 2008  
Oertel 2012  
Orenius 2017  
Oshiro 2007  
Oshiro 2009  
Pazmany 2017  
Peltz 2011  
Perini 2013  
Perlaki 2015  
Perrotta 2017  
Petschow 2016  
Piche 2010  
Pogatzki-Zahn 2010  
Pujol 2017  
Quiton 2014  
Roberts 2008  
Rodriguez-Raecke 2010  
Rosenberger 2009  
Rottmann 2010  
Roy 2009  
Rubio 2015  
Russo 2012  
Rutgen 2015  
Salomons 2015  
Scheef 2012  
Schenk 2017  
Schmahl 2006  
Schoell 2010  
Schulte 2016  
Schulz-Stubner 2004  
Seidel 2015  
Seifert 2007  
Seminowicz 2006  
Seminowicz 2007  
Sevel 2015  
Shelton 2012

Shenoy 2011  
Shinozaki 2016  
Sinke 2016  
Sinke 2017  
Smith 2011  
Song 2006  
Sprenger 2015  
Sprenger 2018  
Stammler 2008  
Stankewitz 2010  
Starr 2009  
Stoeckel 2016  
Strigo 2013a  
Strigo 2013b  
Takahashi 2011  
Talmi 2009  
Tan 2015  
Tedeschi 2015  
Tessitore 2017  
Theysohn 2014  
Tseng 2010  
Tseng 2013  
Tseng 2015  
Tseng 2017  
Vachon-Presseau 2013  
van den Bosch 2013  
Vanhauenhuyse 2009  
von Leupoldt 2008  
von Leupoldt 2009  
Wagner 2009  
Weiss 2008  
Wiech 2005  
Wiech 2006  
Wiech 2009  
Wiech 2010  
Winston 2014  
Woo 2015  
Yang 2012  
Yang 2018  
Yoshino 2010

Youssef 2016  
Zeidan 2015  
Ziv 2010

Cluster 2: 3181 voxels (6, 12, 38)

Ando 2016  
Asghar 2015  
Asghar 2016  
Atlas 2010  
Atlas 2014  
Baliki 2006  
Baliki 2009a  
Baliki 2010  
Becker 2017  
Benson 2012  
Bogdanov 2015  
Boland 2014  
Brinkmeyer 2010  
Brooks 2017  
Brugger 2011  
Choi 2011  
Choi 2016  
Coen 2008  
Coen 2009  
Coen 2011  
Cole 2006  
Cole 2010  
Corradi-Dell' Acqua 2011  
Davis 2016  
De la Fuente-Sandoval 2010  
De la Fuente-Sandoval 2012  
Dobek 2014  
Downar 2003  
Dube 2009  
Dunckley 2005a  
Eisenblatter 2017  
Esser 2017  
Ettlin 2009  
Farmer 2013  
Farrell 2012  
Farrell 2014

Fehse 2015  
Ferris 2016  
Forkmann 2013  
Frankenstein 2001  
Freund 2009  
Gard 2012  
Geuze 2007  
Godinho 2012  
Gracely 2002  
Grant 2011  
Guleria 2017  
Gundel 2008  
Habig 2017  
Hansen 2015  
Hu 2015  
Iannilli 2008  
Ibinson 2013  
Jahn 2016  
Jensen 2015  
Kamping 2016  
Kobuch 2017  
Kobuch 2018  
Kong 2006  
Kong 2010  
Koyama 2005  
Kross 2011  
Ladabaum 2007  
Landgrebe 2008  
Lee 2008  
Loggia 2012  
Longo 2012  
Lopez-Sola 2010a  
Lopez-Sola 2010b  
Lu 2004  
Lui 2008  
Lutz 2013  
Lynn 2016  
Maeda 2011  
Maihofner 2006  
Maihofner 2011

Mainero 2007  
Markl 2013  
Martin 2013  
Mayhew 2013  
Misra 2015  
Mobascher 2009a  
Mobascher 2009b  
Mobascher 2010a  
Mobascher 2010b  
Mochizuki 2007  
Mohr 2008  
Morrison 2004  
Moulton 2011  
Moulton 2012  
Naglatzki 2012  
Nickel 2014  
Niddam 2002  
Obermann 2009  
Ochsner 2006  
Oertel 2008  
Oertel 2012  
Oshiro 2007  
Oshiro 2009  
Peltz 2011  
Perlaki 2015  
Perrotta 2017  
Petschow 2016  
Piche 2010  
Pujol 2017  
Quiton 2014  
Roberts 2008  
Rodriguez-Raecke 2010  
Rottmann 2010  
Roy 2009  
Russo 2012  
Rutgen 2015  
Salomons 2015  
Scheef 2012  
Schenk 2017  
Schmahl 2006



Schulz-Stubner 2004  
Seminowicz 2006  
Seminowicz 2007  
Sevel 2015  
Shelton 2012  
Shenoy 2011  
Shinozaki 2016  
Sinke 2016  
Sinke 2017  
Song 2006  
Sprenger 2015  
Sprenger 2018  
Stankewitz 2010  
Starr 2009  
Stoeckel 2016  
Strigo 2013b  
Takahashi 2011  
Talmi 2009  
Tan 2015  
Tedeschi 2015  
Tessitore 2017  
Theysohn 2014  
Tseng 2013  
Tseng 2015  
Tseng 2017  
Vachon-Pressseau 2013  
Vanhauenhuyse 2009  
von Leupoldt 2008  
von Leupoldt 2009  
Wagner 2009  
Weiss 2008  
Wiech 2005  
Wiech 2010  
Winston 2014  
Woo 2015  
Yang 2012  
Yang 2018  
Yoshino 2010  
Youssef 2016  
Zeidan 2015

Cluster 3: 325 voxels (-32, -56, -34)

Ziv 2010  
Ariji 2018  
Asghar 2015  
Bar 2007  
Benson 2012  
Bogdanov 2015  
Boland 2014  
Boyle 2007  
Brooks 2017  
Corradi-Dell' Acqua 2011  
Dobek 2014  
Dube 2009  
Farrell 2012  
Farrell 2014  
Gracely 2002  
Hahn 2013  
Hansen 2015  
Jahn 2016  
Kamping 2016  
Kim 2013b  
Kong 2010  
Kross 2011  
Lee 2008  
Loggia 2014  
Lopez-Sola 2010a  
Lu 2004  
Mobascher 2009a  
Mobascher 2010a  
Mobascher 2010b  
Mohr 2008  
Nickel 2014  
Oshiro 2009  
Roy 2009  
Rutgen 2015  
Scheef 2012  
Shelton 2012  
Shenoy 2011  
Shinozaki 2016  
Song 2006

Sprenger 2015  
Sprenger 2018  
Starr 2009  
Stoeckel 2016  
Strigo 2013b  
Takahashi 2011  
Tedeschi 2015  
Weiss 2008  
Winston 2014  
Woo 2015  
Youssef 2016

Cluster 4: 238 voxels (48, 4, 42)

Boyle 2007  
Brooks 2017  
Choi 2011  
Coen 2011  
Cole 2006  
Cole 2010  
Dube 2009  
Farmer 2013  
Farrell 2012  
Farrell 2014  
Freund 2007  
Gard 2012  
Geuze 2007  
Iannilli 2008  
Kong 2010  
Kross 2011  
Ladabaum 2007  
Landgrebe 2008  
Loggia 2012  
Longo 2012  
Lopez-Sola 2010a  
Maihofner 2005  
Maihofner 2006  
Maihofner 2011  
Mayhew 2013  
Misra 2015  
Moisset 2010  
Moulton 2011

Ochsner 2006  
Oshiro 2009  
Peltz 2011  
Piche 2010  
Quiton 2014  
Russo 2012  
Salomons 2015  
Scheef 2012  
Schmahl 2006  
Shinozaki 2016  
Stoeckel 2016  
Takahashi 2011  
Tseng 2010  
Tseng 2015  
von Leupoldt 2009  
Wagner 2009  
Winston 2014  
Ziv 2010

---

*Note:* Cluster identification on the first column indicates cluster number, number of voxels in cluster, and peak coordinate of cluster.

**Supplementary Table 2.** PICOS table for search and eligibility criteria.

| Concept                                                 | Keyword/Synonyms                                                                                                                                                                                                                                                                                                     |
|---------------------------------------------------------|----------------------------------------------------------------------------------------------------------------------------------------------------------------------------------------------------------------------------------------------------------------------------------------------------------------------|
| <b>P</b> – Population                                   | Healthy participants over the age of 18                                                                                                                                                                                                                                                                              |
| <b>I</b> - Intervention, Prognostic Factor, or Exposure | Confirmed physical pain induction                                                                                                                                                                                                                                                                                    |
| <b>C</b> - Comparison or Intervention                   | ("pain" or "noxious" or "nociception")                                                                                                                                                                                                                                                                               |
| <b>O</b> - Outcome                                      | <i>Not applicable</i>                                                                                                                                                                                                                                                                                                |
| <b>S</b> - Study                                        | Reported MNI or Talairach coordinate results from BOLD response to pain measured by task-induced fMRI                                                                                                                                                                                                                |
|                                                         | ("MRI" or "magnetic resonance imaging" or "fMRI" or "BOLD" or "brain mapping")                                                                                                                                                                                                                                       |
|                                                         | <ol style="list-style-type: none"> <li>1. Includes at least 10 participants</li> <li>2. Conducts a whole brain search</li> <li>3. Meets statistical threshold of voxel height of <math>p &lt; 0.001</math> uncorrected or cluster-corrected height of <math>p &lt; 0.05</math> for cluster identification</li> </ol> |

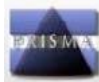

# PRISMA 2009 Checklist

| Section/topic                      | #  | Checklist item                                                                                                                                                                                                                                                                                              | Reported on page # |
|------------------------------------|----|-------------------------------------------------------------------------------------------------------------------------------------------------------------------------------------------------------------------------------------------------------------------------------------------------------------|--------------------|
| <b>TITLE</b>                       |    |                                                                                                                                                                                                                                                                                                             |                    |
| Title                              | 1  | Identify the report as a systematic review, meta-analysis, or both.                                                                                                                                                                                                                                         | 1                  |
| <b>ABSTRACT</b>                    |    |                                                                                                                                                                                                                                                                                                             |                    |
| Structured summary                 | 2  | Provide a structured summary including, as applicable: background; objectives; data sources; study eligibility criteria, participants, and interventions; study appraisal and synthesis methods; results; limitations; conclusions and implications of key findings; systematic review registration number. | 2                  |
| <b>INTRODUCTION</b>                |    |                                                                                                                                                                                                                                                                                                             |                    |
| Rationale                          | 3  | Describe the rationale for the review in the context of what is already known.                                                                                                                                                                                                                              | 3                  |
| Objectives                         | 4  | Provide an explicit statement of questions being addressed with reference to participants, interventions, comparisons, outcomes, and study design (PICOS).                                                                                                                                                  | 3                  |
| <b>METHODS</b>                     |    |                                                                                                                                                                                                                                                                                                             |                    |
| Protocol and registration          | 5  | Indicate if a review protocol exists, if and where it can be accessed (e.g., Web address), and, if available, provide registration information including registration number.                                                                                                                               | 5                  |
| Eligibility criteria               | 6  | Specify study characteristics (e.g., PICOS, length of follow-up) and report characteristics (e.g., years considered, language, publication status) used as criteria for eligibility, giving rationale.                                                                                                      | supplementary      |
| Information sources                | 7  | Describe all information sources (e.g., databases with dates of coverage, contact with study authors to identify additional studies) in the search and date last searched.                                                                                                                                  | 5-6                |
| Search                             | 8  | Present full electronic search strategy for at least one database, including any limits used, such that it could be repeated.                                                                                                                                                                               | 5                  |
| Study selection                    | 9  | State the process for selecting studies (i.e., screening, eligibility, included in systematic review, and, if applicable, included in the meta-analysis).                                                                                                                                                   | 8                  |
| Data collection process            | 10 | Describe method of data extraction from reports (e.g., piloted forms, independently, in duplicate) and any processes for obtaining and confirming data from investigators.                                                                                                                                  | 8-9                |
| Data items                         | 11 | List and define all variables for which data were sought (e.g., PICOS, funding sources) and any assumptions and simplifications made.                                                                                                                                                                       | supplementary      |
| Risk of bias in individual studies | 12 | Describe methods used for assessing risk of bias of individual studies (including specification of whether this was done at the study or outcome level), and how this information is to be used in any data synthesis.                                                                                      | NA                 |
| Summary measures                   | 13 | State the principal summary measures (e.g., risk ratio, difference in means).                                                                                                                                                                                                                               | 10                 |
| Synthesis of results               | 14 | Describe the methods of handling data and combining results of studies, if done, including measures of consistency (e.g., $I^2$ ) for each meta-analysis.                                                                                                                                                   | 10                 |



# PRISMA 2009 Checklist

| Section/topic                 | #  | Checklist item                                                                                                                                                                                           | Reported on page # |
|-------------------------------|----|----------------------------------------------------------------------------------------------------------------------------------------------------------------------------------------------------------|--------------------|
| Risk of bias across studies   | 15 | Specify any assessment of risk of bias that may affect the cumulative evidence (e.g., publication bias, selective reporting within studies).                                                             | 13                 |
| Additional analyses           | 16 | Describe methods of additional analyses (e.g., sensitivity or subgroup analyses, meta-regression), if done, indicating which were pre-specified.                                                         | 12-13              |
| <b>RESULTS</b>                |    |                                                                                                                                                                                                          |                    |
| Study selection               | 17 | Give numbers of studies screened, assessed for eligibility, and included in the review, with reasons for exclusions at each stage, ideally with a flow diagram.                                          | 13-14              |
| Study characteristics         | 18 | For each study, present characteristics for which data were extracted (e.g., study size, PICOS, follow-up period) and provide the citations.                                                             | supplementary      |
| Risk of bias within studies   | 19 | Present data on risk of bias of each study and, if available, any outcome level assessment (see item 12).                                                                                                | NA                 |
| Results of individual studies | 20 | For all outcomes considered (benefits or harms), present, for each study: (a) simple summary data for each intervention group (b) effect estimates and confidence intervals, ideally with a forest plot. | supplementary      |
| Synthesis of results          | 21 | Present results of each meta-analysis done, including confidence intervals and measures of consistency.                                                                                                  | 14                 |
| Risk of bias across studies   | 22 | Present results of any assessment of risk of bias across studies (see Item 15).                                                                                                                          | 14                 |
| Additional analysis           | 23 | Give results of additional analyses, if done (e.g., sensitivity or subgroup analyses, meta-regression [see Item 16]).                                                                                    | 15-20              |
| <b>DISCUSSION</b>             |    |                                                                                                                                                                                                          |                    |
| Summary of evidence           | 24 | Summarize the main findings including the strength of evidence for each main outcome; consider their relevance to key groups (e.g., healthcare providers, users, and policy makers).                     | 21                 |
| Limitations                   | 25 | Discuss limitations at study and outcome level (e.g., risk of bias), and at review-level (e.g., incomplete retrieval of identified research, reporting bias).                                            | 26-27              |
| Conclusions                   | 26 | Provide a general interpretation of the results in the context of other evidence, and implications for future research.                                                                                  | 27                 |
| <b>FUNDING</b>                |    |                                                                                                                                                                                                          |                    |
| Funding                       | 27 | Describe sources of funding for the systematic review and other support (e.g., supply of data); role of funders for the systematic review.                                                               | 28                 |

From: Moher D, Liberati A, Tetzlaff J, Altman DG, The PRISMA Group (2009). Preferred Reporting Items for Systematic Reviews and Meta-Analyses: The PRISMA Statement. PLoS Med 6(7): e1000097. doi:10.1371/journal.pmed1000097

For more information, visit: [www.prisma-statement.org](http://www.prisma-statement.org).

**Supplementary Figure 1.** PRISMA checklist for reporting of meta-analyses.
